1  
2 **Cryo-EM structure of adenovirus type 3 fibre with desmoglein 2 shows a novel mode of**  
3 **receptor engagement**  
4  
5  
6

7 Authors :

8 Emilie Vassal-Stermann<sup>1#</sup>; Gregory Effantin<sup>1#</sup>; Chloe Zubieta<sup>2</sup>; Wim Burmeister<sup>1</sup>; Frédéric  
9 Iseni<sup>3</sup>; Hongjie Wang<sup>4</sup>; André Lieber<sup>4\*</sup>; Guy Schoehn<sup>1</sup> and Pascal Fender<sup>1\*</sup>  
10

11 Affiliations :

12 <sup>1</sup> Institut de Biologie Structurale (IBS), Université Grenoble Alpes, CNRS, CEA, 71 Avenue  
13 des Martyrs, 38042, Grenoble, France.

14 <sup>2</sup> Laboratoire de Physiologie Cellulaire et Végétale, Biosciences and Biotechnology Institute  
15 of Grenoble, UMR5168, CNRS/CEA/INRA/UGA, 17 Rue des Martyrs, 38054 Grenoble,  
16 France.

17 <sup>3</sup> Unité de Virologie, Institut de Recherche Biomédicale des Armées, BP 73, 91223, Brétigny-  
18 sur-Orge Cedex, France.

19 <sup>4</sup> University of Washington, Department of Medicine, Division of Medical Genetics, Box  
20 357720, Seattle, WA 98195, USA.

21  
22 \* corresponding authors ([pascal.fender@ibs.fr](mailto:pascal.fender@ibs.fr) - [lieber00@u.washington.edu](mailto:lieber00@u.washington.edu))

23 # the two first authors contributed equally to this work  
24  
25

26 **Abstract**

27 Attachment of adenovirus (HAd) to host cell is a critical step of infection. This work  
28 reports the cryo-electron microscopy (cryo-EM) structure of a non-symmetrical complex  
29 smaller than 100kDa formed by the trimeric human adenovirus of type 3 fibre knob (HAd3K)  
30 and human desmoglein 2 (DSG2). The structure reveals a unique stoichiometry, shedding  
31 light to new adenovirus infection strategies and providing new insights for adenoviral vector  
32 development.  
33  
34

35 **Main text**

36 Desmoglein 2, a newly identified adenovirus receptor has been reported to be used  
37 by species B human adenoviruses such as HAd3, HAd7, HAd11 and HAd14 for cell infection<sup>1</sup>.  
38 As exemplified by HAd3 and HAd11, these viruses are used for cancer virotherapy<sup>2,3,4</sup>. The  
39 structure of the extracellular region of DSG2 containing four cadherin domains EC1 to EC4,  
40 has recently been solved by crystallography<sup>5</sup>. The intermediate portion of the DSG2  
41 ectodomain, consisting of EC2 and EC3, has been described as important for recognition by  
42 the HAd3 knob (HAd3K), the trimeric globular distal part of the fibre protein. HAd3K binds to  
43 DSG2 by non-classical mechanism involving mainly one receptor bound per trimeric fibre  
44 knob resulting in a sedimentation coefficient of 5.40S corresponding to a 96kDa complex<sup>6</sup>.

45 To investigate the specificity of DSG2 interaction with adenovirus, we have  
46 determined the structure of HAd3K in complex with EC2-EC3 by phase plate cryo-EM. The  
47 interaction takes place at the top of the trimeric HAd3K (**Figure 1a-b**). This observation is in  
48 stark contrast with both CD46/HAd11K and CAR/HAd12K interactions which involved the  
49 intermediate or lower part of the knob respectively<sup>7,8</sup> (**Figure 1c-d**). The location of only one

50 EC2-EC3 close to the three-fold axis is unusual as compared to CD46 and CAR for which three  
51 receptors were found at the periphery of the fibre knob. Moreover, different population of  
52 particles with either one or two EC2-EC3 modules (HAd3K / EC2-EC3 and HAd3K / (EC2-  
53 EC3)<sub>2</sub>) were identifiable (**Supplementary Figure S1.a-c**) in agreement with the 5,40S and  
54 7,34S species previously reported<sup>6</sup>. The 3D structures were solved to an overall resolution of  
55 3.5 and 3.8 Å, respectively. The resolution of both 3D maps is relatively uniform, the HAd3K  
56 and the EC2-EC3 core regions being slightly better defined than the receptor's distal parts  
57 (**Supplementary Figure S1.d-e**). The atomic coordinates of both HAd3K (PDB: 1H7Z) and EC2-  
58 EC3 (PDB: 5ERD) were used to fit the cryo-EM maps and refined (**Figure 1a, Supplementary**  
59 **Figure S1.f-k**).

60 Whether one or two receptors are bound, both EC2 and EC3 domains are involved in  
61 the interaction (**Figure 2a-b, Supplementary Figure S2.a-b**). This observation is in agreement  
62 with the biochemical data reporting that EC3 is critical for HAd3K binding while EC2 stabilizes  
63 this interaction<sup>6</sup>. Several residues distributed along the EC2 primary sequence were found to  
64 interact with the HAd3K monomer A, while only one region in EC3 (covering residues 313 to  
65 321) is involved in the interaction with the groove of monomer B (**Figure 2c**). Thus, each  
66 DSG2 cadherin domains interact with one monomer (**Figure 2a-b**) as previously reported for  
67 CD46 (SCR1 and SCR2 domains) interaction with HAd11K (**Figure 1c**). The residues at the  
68 interface of HAd3K and EC2-EC3 module have been identified (**Figure 2c-d**). Of note, in a  
69 previous work using random mutations in the HAd3K, we have reported that single  
70 mutations of either N186D, V189G, S190P or L296R reduced DSG2 binding by more than 80%  
71 and that D261N or F265L totally abolished the binding<sup>9</sup>. Remarkably, all these residues were  
72 found to be involved in the interaction at the light of the present structure (**Figure 2d**).  
73 Examples include S190/S175 or D261 forming a salt bridge with R316, stabilizing the loop  
74 conformation of HAd3, which is likely required for DSG2 binding (**Supplementary Figure S2c-**  
75 **d**).

76 As mentioned above, beside the 5,40S complex consisting of one receptor per  
77 trimeric knob a second minor population of 7,34S (HAd3K / (EC2-EC3)<sub>2</sub>) has also been found.  
78 In the 7.34S complex, one of the two EC2-EC3 modules is bound similarly to the receptor of  
79 the 5.40S complex. However, the relative positions of EC2 and EC3 differ slightly in the cryo-  
80 EM maps (rmsd of 2.585 Å) likely due to the binding of the second module in the 7.34S  
81 species. The structural data provided here exclude again the three-receptor per knob  
82 *scenario*. The 1:1 (receptor:knob) binding strategy is more in agreement with both the  
83 statistical data (**Supplementary Table1**) and with our previously biochemical study<sup>6</sup>. Of note,  
84 multimerization of the trimeric HAd3K is necessary to cluster enough DSG2 molecules for  
85 intracellular signaling that leads to junction opening<sup>10,11</sup>. Anyhow, the DSG2 interaction with  
86 adenoviruses differs from the CAR or CD46 ones.

87 Another notable feature of the HAd3K / DSG2 interaction is a conformational change  
88 between the unbound and bound receptor. When superimposing the cryo-EM and  
89 crystallography structures by their EC2 domains (rmsd = 0.826 Å), it appears that the EC3  
90 domain rotates upon interaction with HAd3K (**Figure 2e**) by ~14°. The same observation is  
91 true if the structures are superimposed by their EC3 domains (rmsd = 1.223 Å). This leads to  
92 the conclusion that the relative orientation of EC2 and EC3 is altered upon binding to HAd3K.  
93 A similar observation has been made for the binding of CD46 to HAd11K where an even  
94 more dramatic change of curvature (~60°) between CD46 SCR1 and SCR2 was observed upon  
95 binding. The HAd3 structure, in contrast does not exhibit dramatic rearrangement upon EC2-  
96 EC3 binding.

97 The data presented here reveal a new mode of interaction for DSG2 interacting  
98 adenoviruses and provides new clues for the rational design of DSG2 interacting  
99 adenoviruses, subviral particles, or fibre knobs. Such vectors are currently undergoing a  
100 rapid development in therapy with HAd3, HAd11 being used in clinical trials<sup>2,3,4</sup>. Beside the  
101 use of oncolytic adenoviruses, HAd3 fibre-containing molecules such as penton-  
102 dodecahedron (symmetric particle harboring 12 fibres) or junction-openers (JOs) have been  
103 reported to act as enhancer of approved treatments in cancer therapies<sup>1,10-12</sup>

104

#### 105 **Author contributions**

106 AL & PF supervised the project. EVS, GE, FI, GS designed the experiments. EVS, GE, CZ, HW  
107 and WB performed the biochemical and structural experiments. EVS, GE, GS, AL and PF  
108 wrote the manuscript.

109 The authors declare to have no conflict of interest or competing financial interests.

110

#### 111 **Acknowledgments:**

112 We are grateful to the ANR for its support to the 'Ad-Cadh' project ANR-18-CE11-0001. We  
113 acknowledge access to the European Synchrotron Radiation Facility (ESRF), and thank CM01  
114 scientists for their help with data collection. This work used the platforms of the Grenoble  
115 Instruct-ERIC Center (ISBG: UMS 3518 CNRS-CEA-UGA-EMBL) with support from FRISBI (ANR-  
116 10 INSB-05-02) and GRAL (ANR-10-LABX-49-01) within the Grenoble Partnership for  
117 Structural Biology (PSB). We thank Daphna Fenel and Emmanuelle Neumann for preliminar  
118 negative staining screening. The electron microscope facility is supported by the Rhône-  
119 Alpes Region, the Fondation Recherche Medicale (FRM), the Fonds Européen de  
120 Développement Régional (FEDER) and the GIS-Infrastructures en Biologie Sante et Agronomie  
121 (IBISA).

122

123

#### 124 **Legends to Figures**

125

126 **Figure 1: Atomic reconstruction of HAd3K/EC2-EC3 complex and comparison to other**  
127 **adenoviral receptors.** (a) Side view of HAd3K/EC2-EC3 complex with the three HAd3K  
128 monomers colored in blue, gold and red and EC2-EC3 colored in orange. (b) Top view of the  
129 same complex. (c) Top view of HAd11 Knob structure with three CD46 SCR1&2 molecules in  
130 orange (PDB: 2O39). (d) Top view of HAd12 Knob with CAR D1 domain in orange (PDB: 1KAC)

131

132 **Figure 2: Determination of residues from HAd3K and EC2-EC3 involved in the interaction.**

133 (a) Surface of EC2-EC3 interacting with HAd3K. Aminoacids making contact with HAd3K are  
134 colored in light or dark green according to their interaction with monomer A or B,  
135 respectively. For a better view only two monomers of HAd3K are represented in cartoon. (b)  
136 Surface of HAd3K involved in receptor binding. HAd3K aminoacids involved in binding are  
137 highlighted in dark purple (EC2 contacts) and light purple (EC3 contacts). (c) EC2-EC3 primary  
138 sequence with aminoacids making contact with the knob are colored using same color code  
139 than in (a). (d) Primary sequence of HAd3K with  $\beta$ -strand depicted with arrows. Contact-  
140 forming residues of HAd3K are depicted with same colors as in (b). Asterisks (\*) denote  
141 residues for which single mutation reduce DSG2 binding by more than 80%<sup>9</sup>. (e)  
142 Superimposition of free and bound EC2-EC3 (in pink and orange, respectively) with HAd3K in  
143 grey.

144 **References**

145

- 146 1. Wang, H. *et al.* Desmoglein 2 is a receptor for adenovirus serotypes 3, 7, 11 and 14.  
147 *Nat. Med.* **17**, 96–104 (2011).
- 148 2. Hemminki, O. *et al.* Oncolytic adenovirus based on serotype 3. *Cancer Gene Ther.* **18**,  
149 288–296 (2011).
- 150 3. Garcia-Carbonero, R. *et al.* Phase 1 study of intravenous administration of the  
151 chimeric adenovirus enadenotucirev in patients undergoing primary tumor resection.  
152 *Journal for ImmunoTherapy of Cancer* **5**, (2017).
- 153 4. Illingworth, S. *et al.* Preclinical Safety Studies of Enadenotucirev, a Chimeric Group B  
154 Human-Specific Oncolytic Adenovirus. *Molecular Therapy - Oncolytics* **5**, 62–74 (2017).
- 155 5. Harrison, O. J. *et al.* Structural basis of adhesive binding by desmocollins and  
156 desmogleins. *Proc. Natl. Acad. Sci. U.S.A.* **113**, 7160–7165 (2016).
- 157 6. Vassal-Stermann, E. *et al.* Mapping of Adenovirus of serotype 3 fibre interaction to  
158 desmoglein 2 revealed a novel ‘non-classical’ mechanism of viral receptor engagement.  
159 *Scientific Reports* **8**, (2018).
- 160 7. Bewley, M. C., Springer, K., Zhang, Y. B., Freimuth, P. & Flanagan, J. M. Structural  
161 analysis of the mechanism of adenovirus binding to its human cellular receptor, CAR. *Science*  
162 **286**, 1579–1583 (1999).
- 163 8. Persson, B. D. *et al.* Adenovirus type 11 binding alters the conformation of its  
164 receptor CD46. *Nat. Struct. Mol. Biol.* **14**, 164–166 (2007).
- 165 9. Wang, H. *et al.* Structural and functional studies on the interaction of adenovirus  
166 fiber knobs and desmoglein 2. *J. Virol.* **87**, 11346–11362 (2013).
- 167 10. Fender, P., Hall, K., Schoehn, G. & Blair, G. E. Impact of human adenovirus type 3  
168 dodecahedron on host cells and its potential role in viral infection. *J. Virol.* **86**, 5380–5385  
169 (2012).
- 170 11. Wang, H. *et al.* Multimerization of adenovirus serotype 3 fiber knob domains is  
171 required for efficient binding of virus to desmoglein 2 and subsequent opening of epithelial  
172 junctions. *J. Virol.* **85**, 6390–6402 (2011).
- 173 12. Richter, M. *et al.* Preclinical safety and efficacy studies with an affinity-enhanced  
174 epithelial junction opener and PEGylated liposomal doxorubicin. *Mol Ther Methods Clin Dev*  
175 **2**, 15005 (2015).
- 176

**a**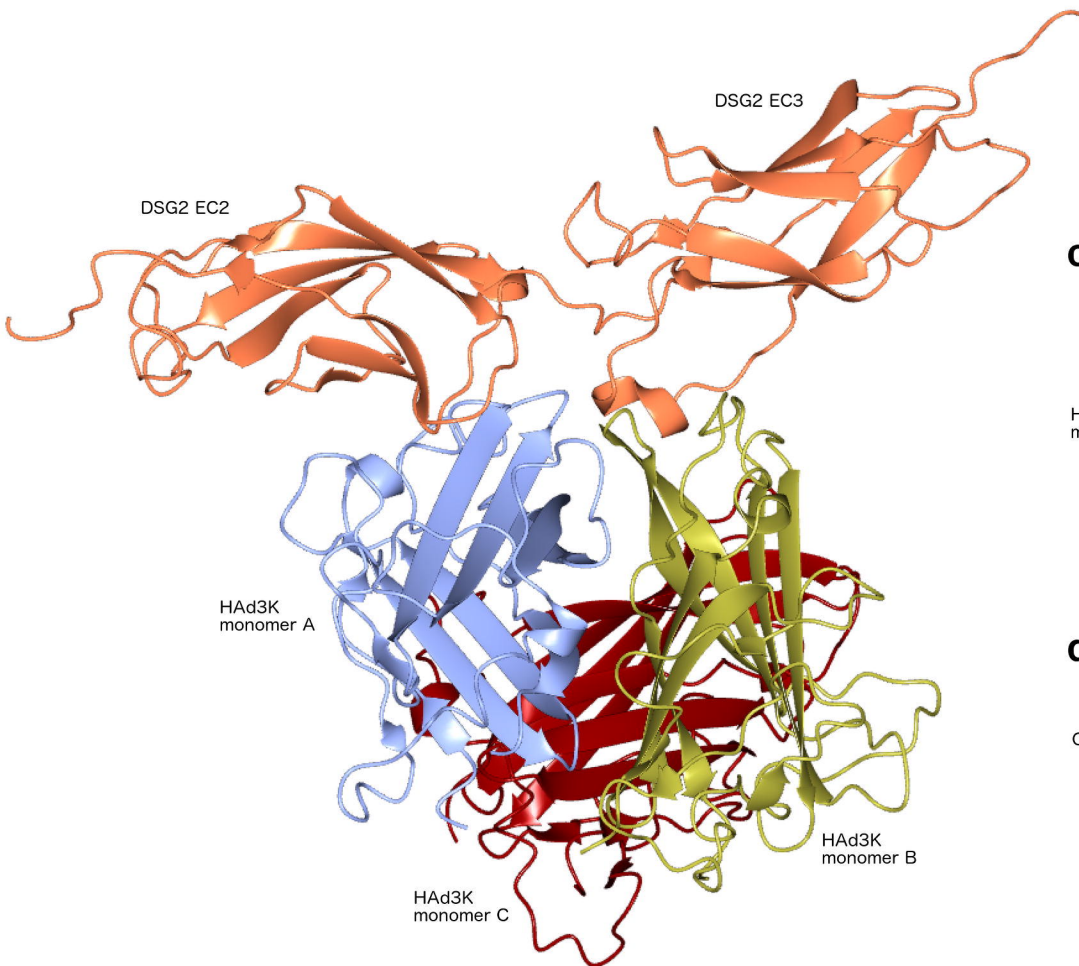**b**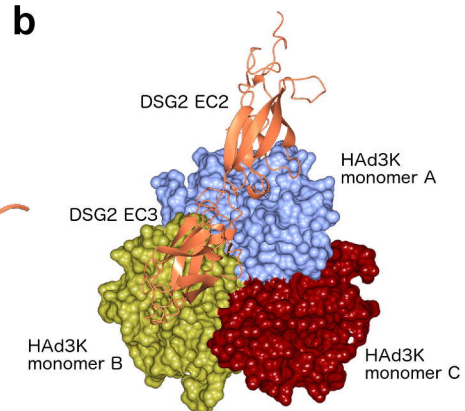**c**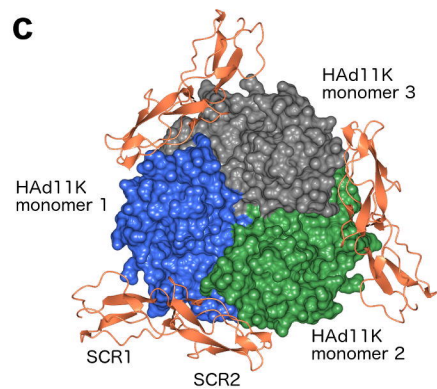**d**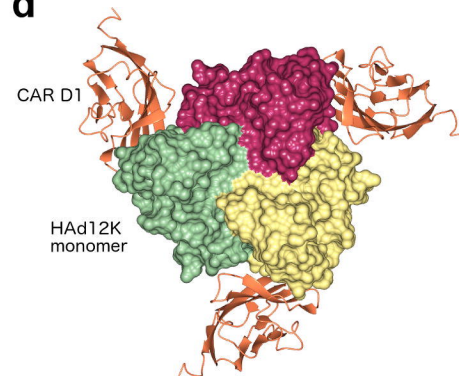



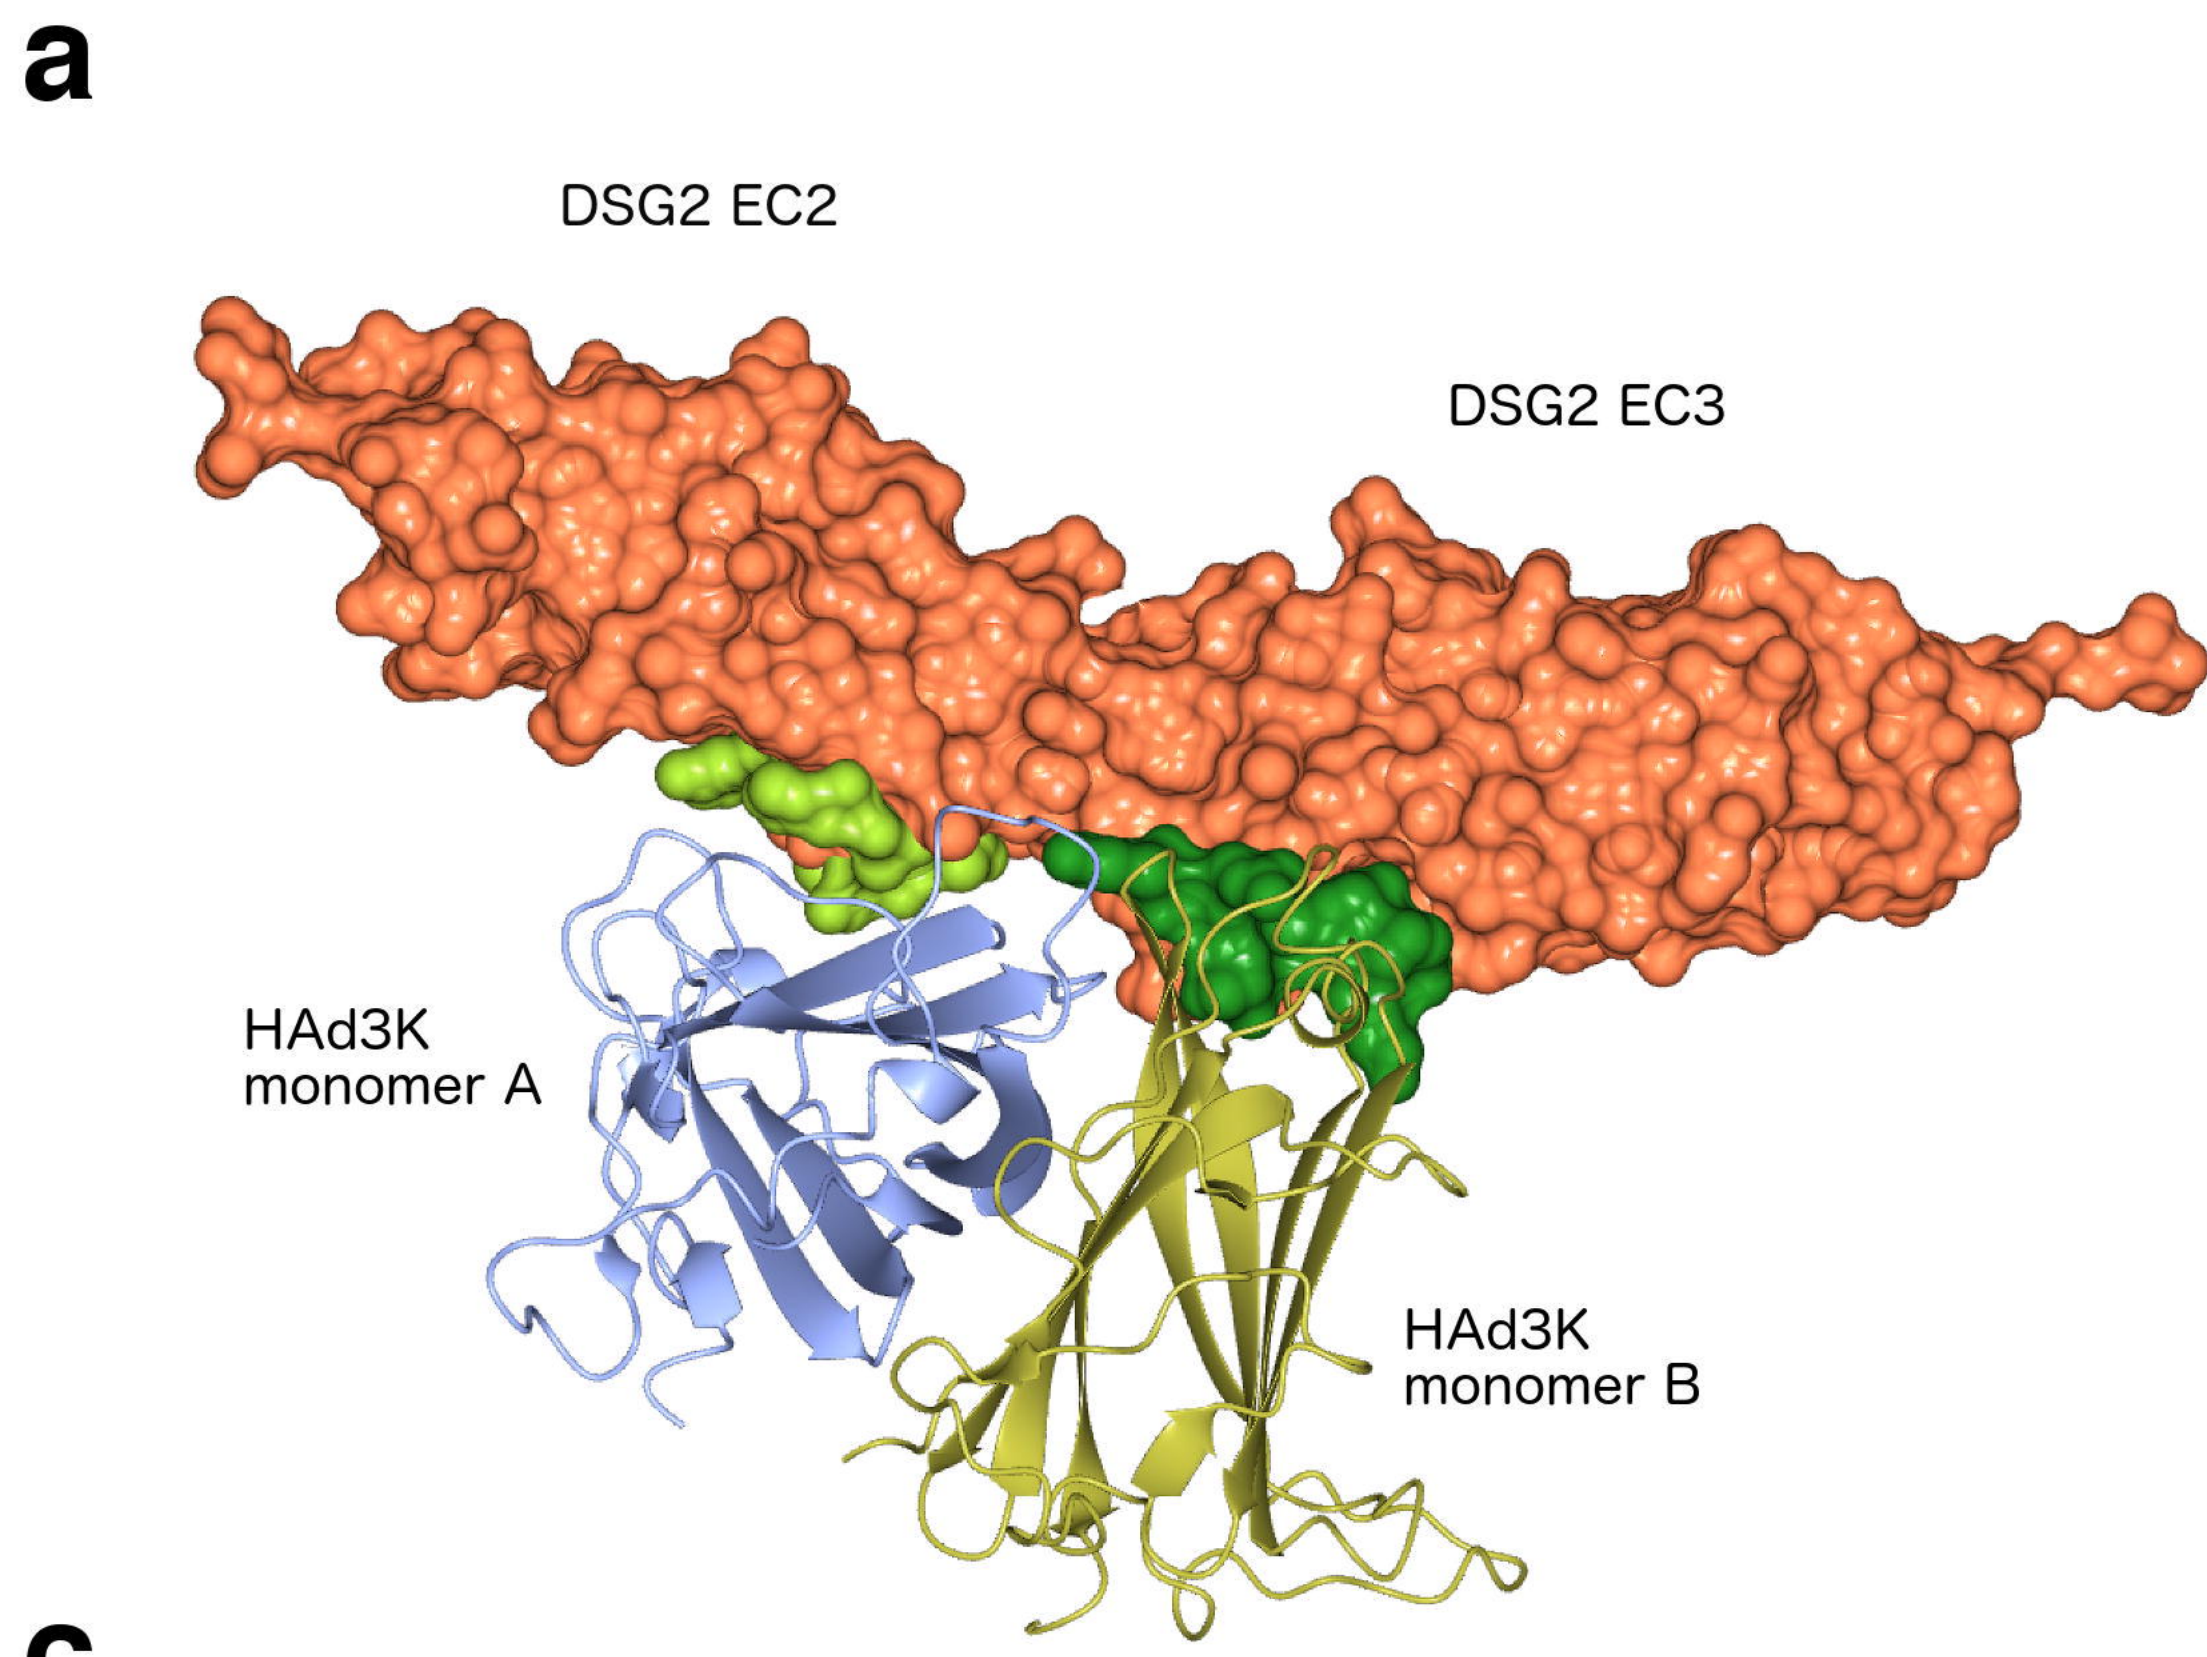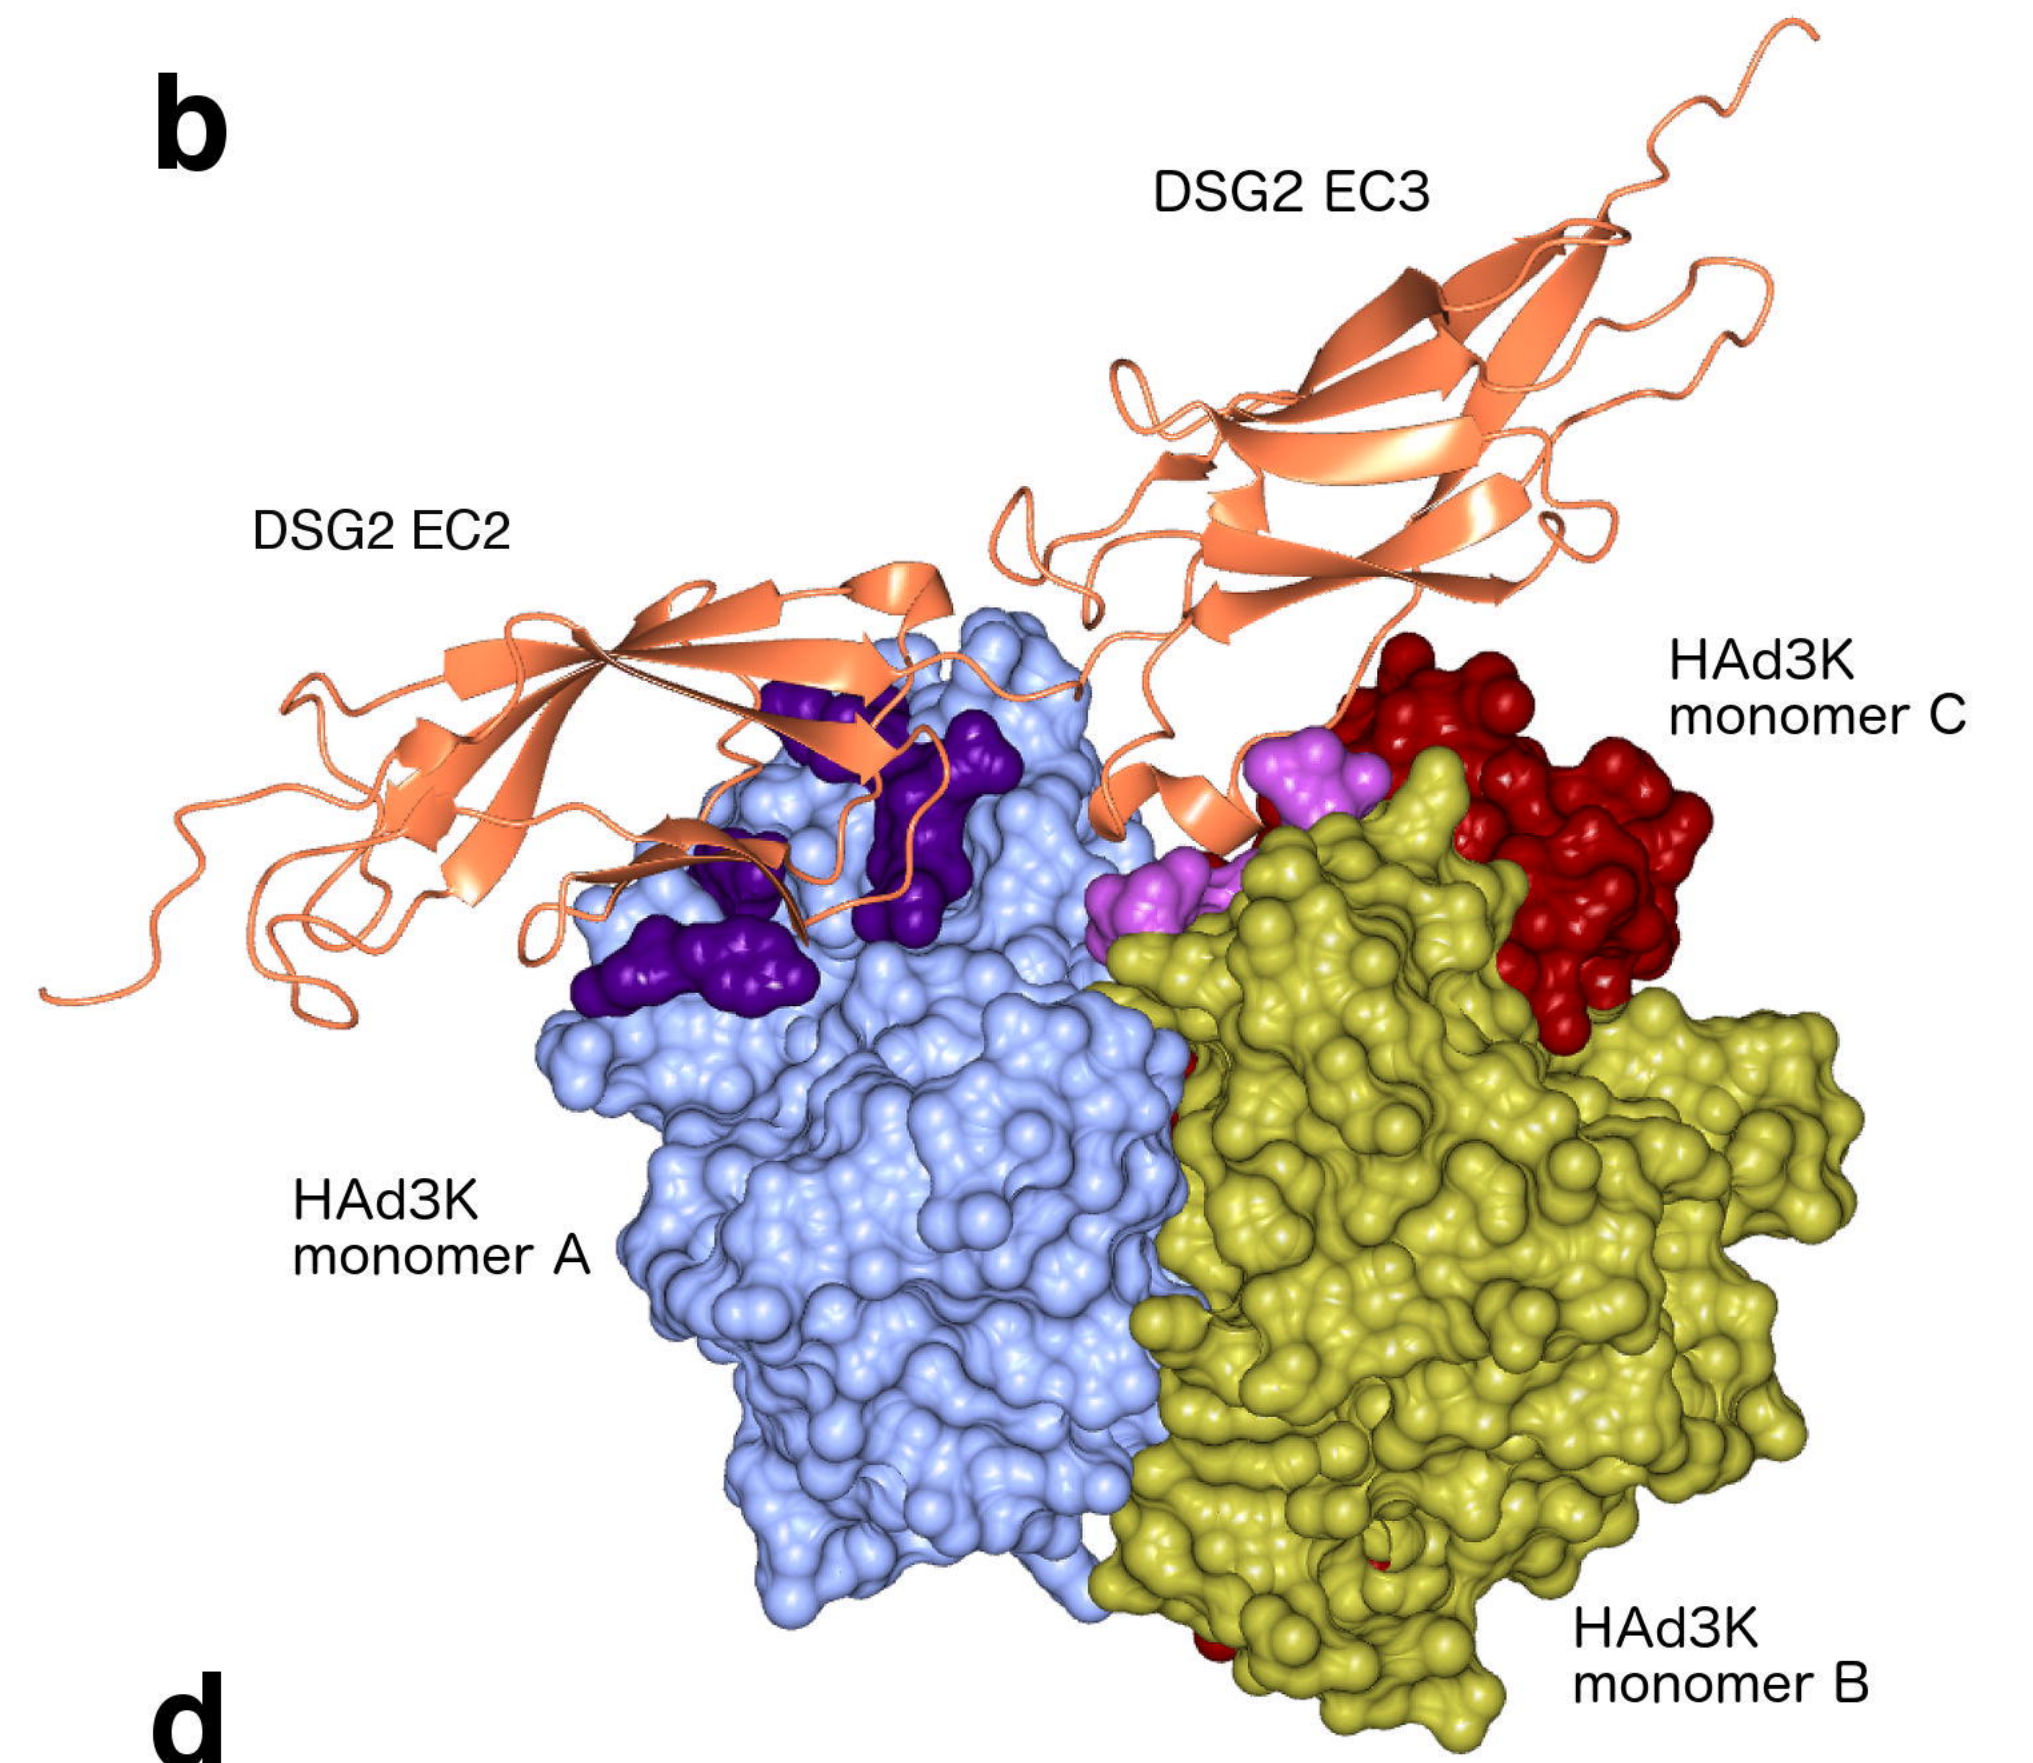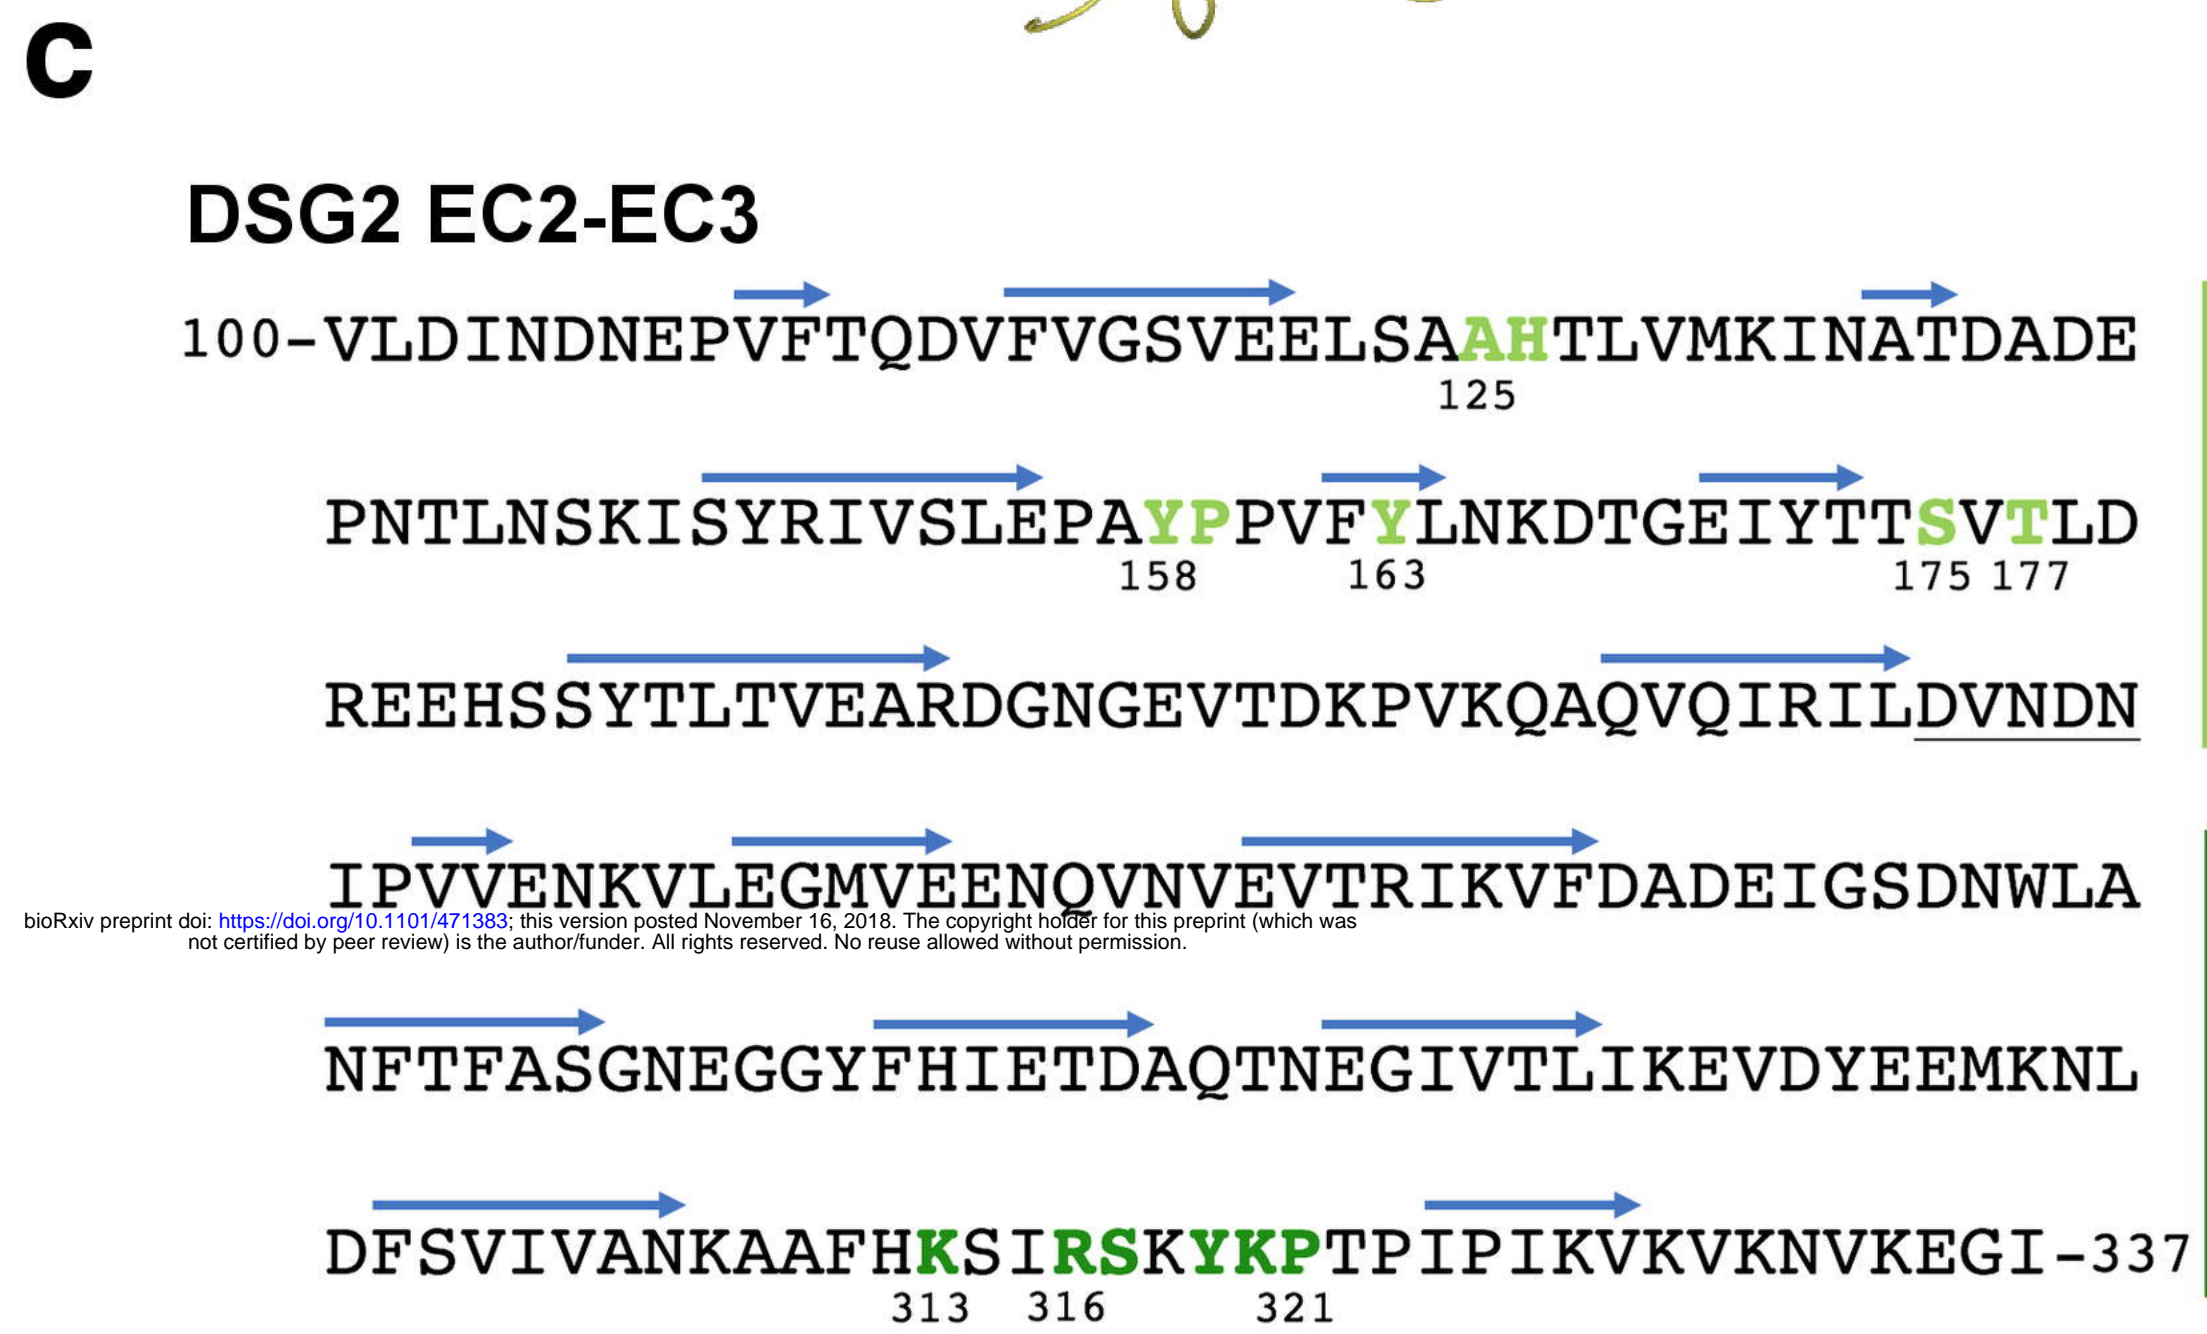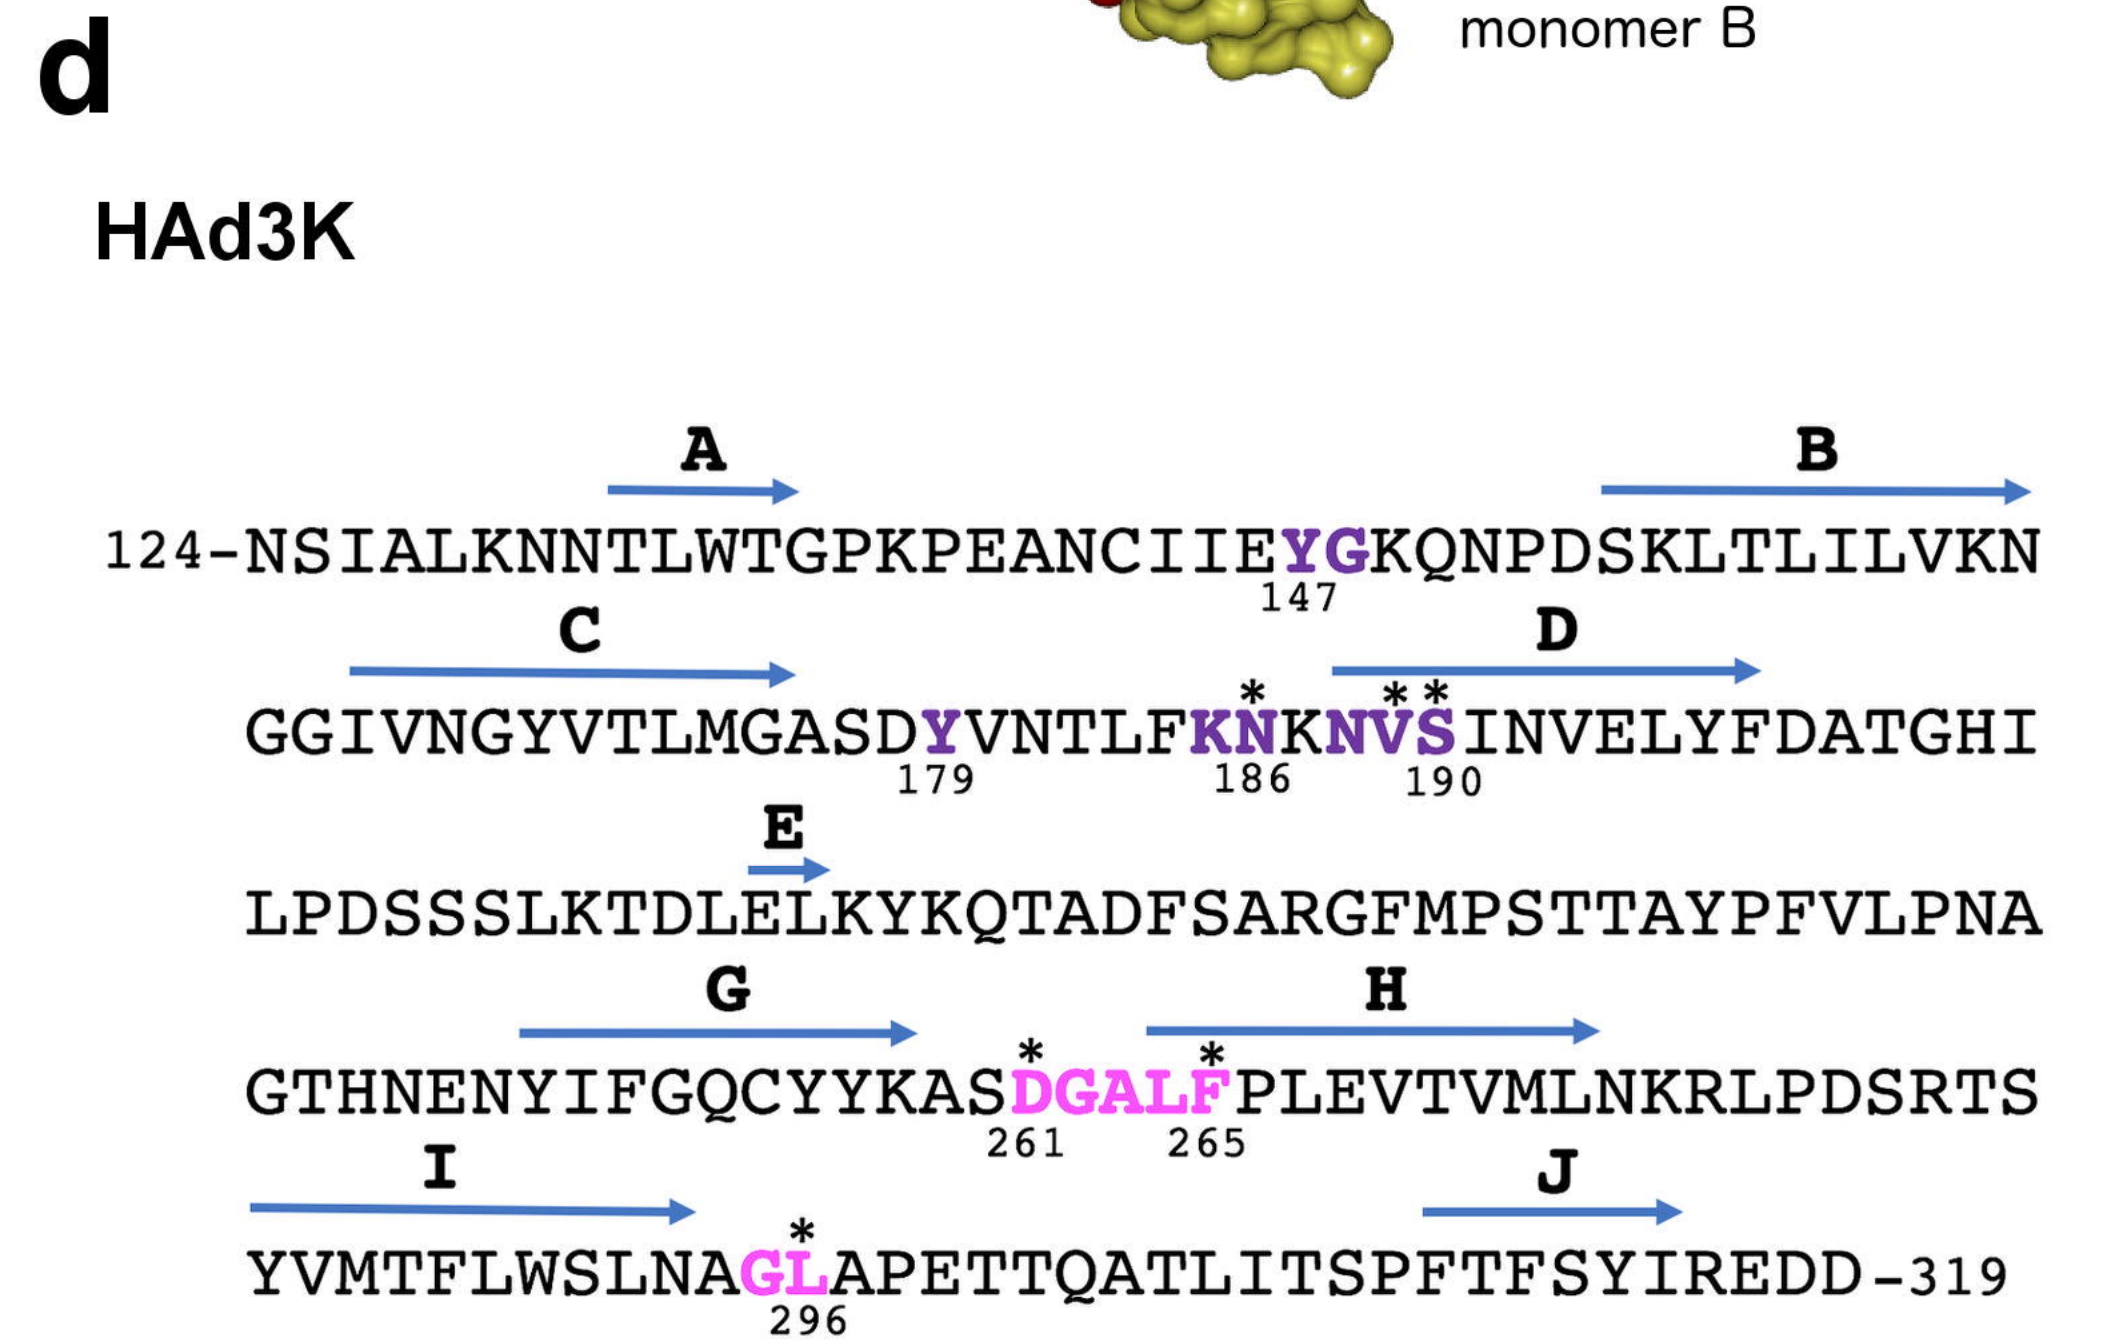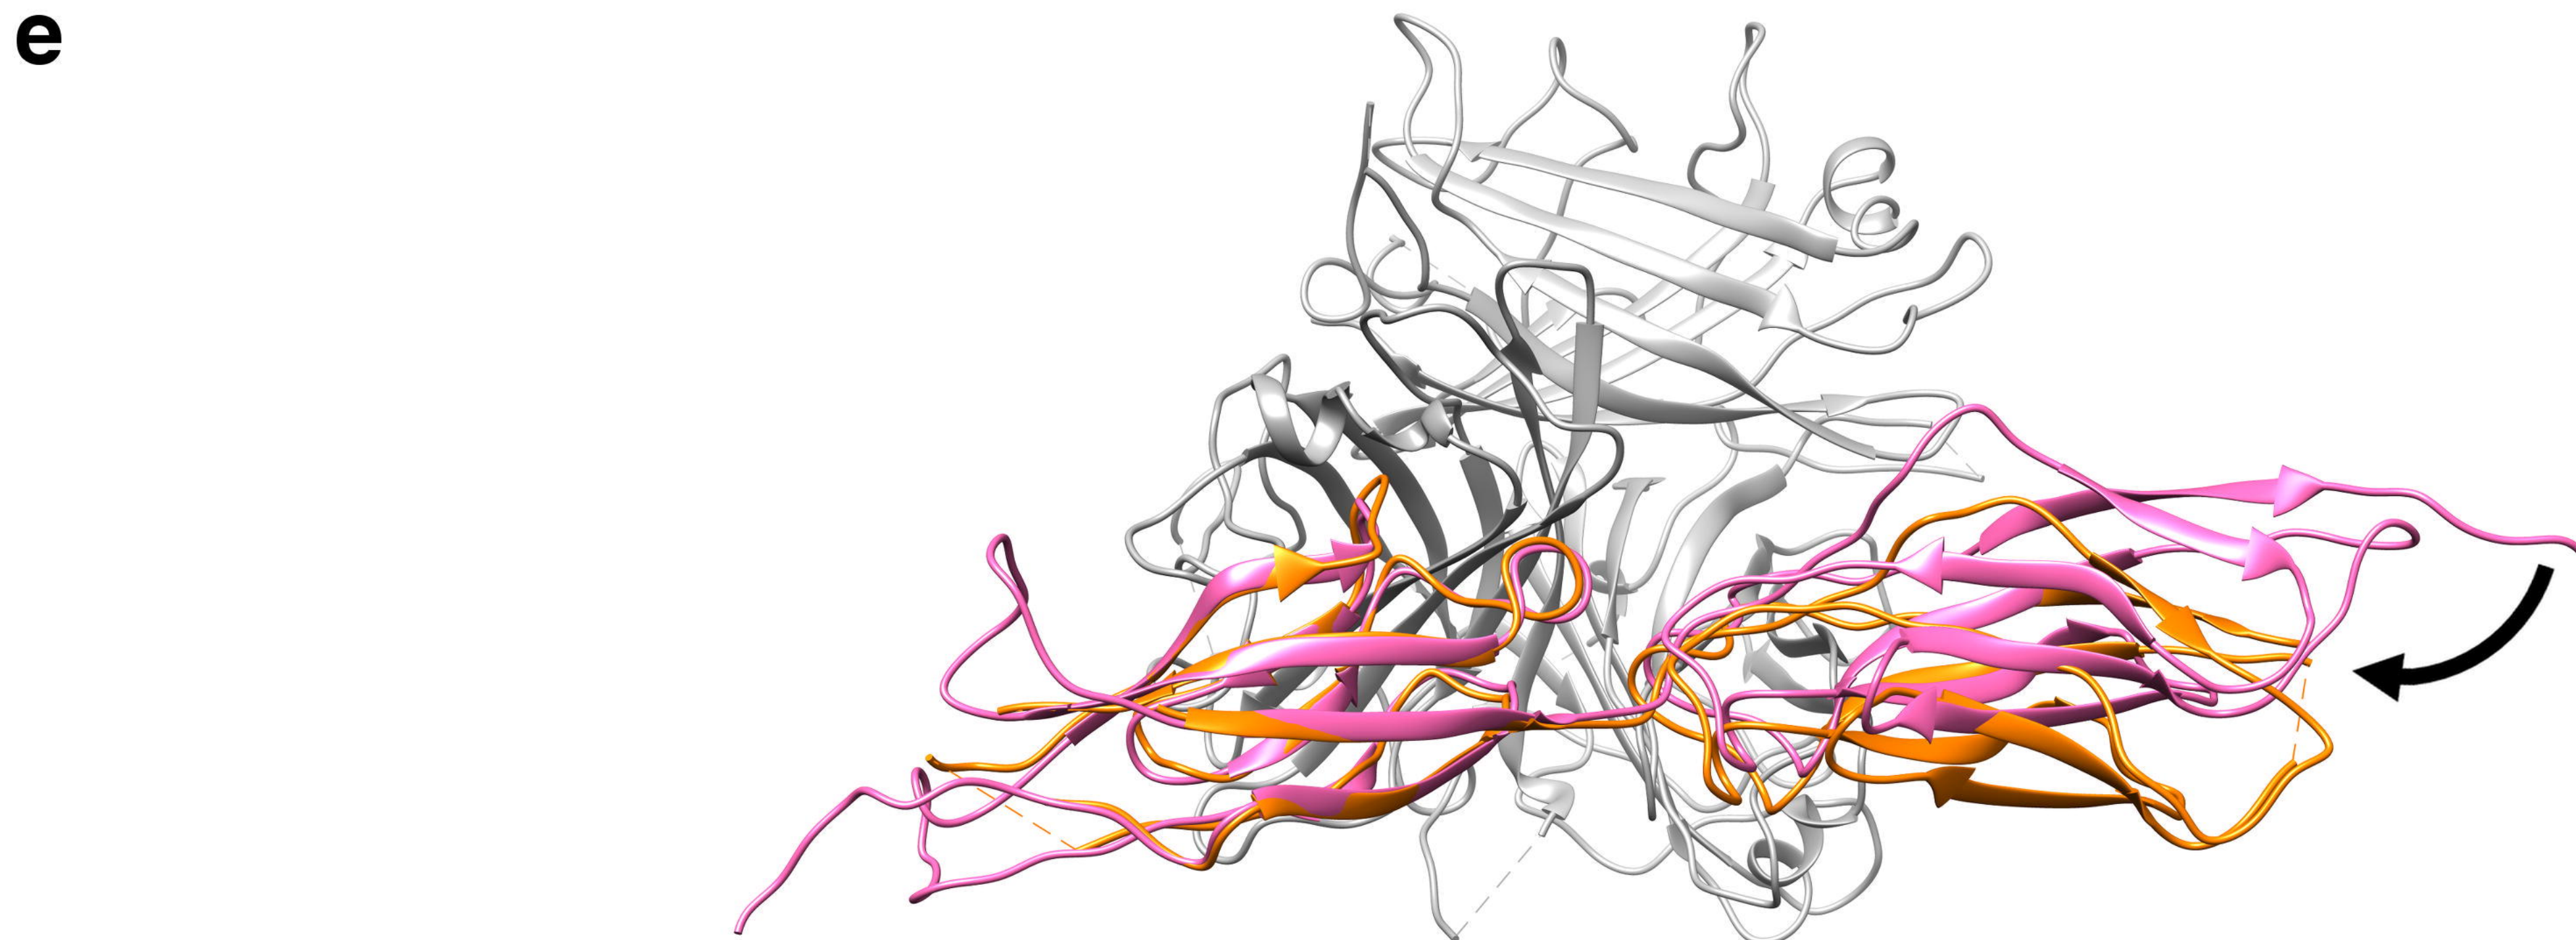

Source: http://biorxiv.org/content/10.1101/471383v1.full.pdf
